# Supplementary material for: Interlaboratory comparison of endotoxin contamination assessment of nanomaterials
Source: Royal Society of Chemistry journal article supplement (doi:10.1039/d4nr02821j), 2024-01-01
Supplement: d4nr02821j1.pdf [file d4nr02821j1.pdf]

## Supplementary information

### Interlaboratory comparison of endotoxin contamination assessment of nanomaterials

Gary Hannon<sup>1,2\*</sup>, Bethany J. Heaton<sup>3,4</sup>, Alexander Plant-Hately<sup>3,4</sup>, Christopher David<sup>3,4</sup>, Neill J. Liptrott<sup>3,4</sup>, Ainhoa Egizabal<sup>5</sup>, Ana Ayerdi-Izquierdo<sup>5</sup>, Noelia Alvarez<sup>5</sup>, Oihane Ibarrola<sup>6</sup>, Andres Arbona Celaya<sup>6</sup>, Angel Del Pozo Perez<sup>6</sup>, Fikirte Debebe Zegeye<sup>7</sup>, Shanbeh Zienolddiny-Narui<sup>7</sup>, An Jacobs<sup>8</sup>, Alexandra Van Driessche<sup>8</sup>, Inge Nelissen<sup>8</sup>, Ibane Abasolo<sup>9,10,11</sup>, Fernanda Andrade<sup>9,10</sup>, Nora Ventosa<sup>10,12</sup>, Elisabet González-Mira<sup>10,12</sup>, Aida Carreño<sup>10,12</sup> and Adriele Prina-Mello<sup>1,2,13\*</sup>

<sup>1</sup>Nanomedicine and Molecular Imaging Group, Department of Clinical Medicine, Trinity Translational Medicine Institute, Trinity College Dublin, Dublin, Ireland.

<sup>2</sup>Laboratory of Biological Characterization of Advanced Materials (LBCAM), Trinity Translational Medicine Institute, Trinity College Dublin, Dublin, Ireland.

<sup>3</sup>Immunocompatibility Group, Department of Pharmacology and Therapeutics, Institute of Systems, Molecular, and Integrative Biology, University of Liverpool, Liverpool, UK.

<sup>4</sup>Centre of Excellence for Long-Acting Therapeutics, Department of Pharmacology and Therapeutics, Institute of Systems, Molecular, and Integrative Biology, University of Liverpool, Liverpool, UK.

<sup>5</sup>TECNALIA, Basque Research and Technology Alliance (BRTA), Mikeletegi Pasealekua 2, 20009 Donostia-San Sebastián, Spain.

<sup>6</sup>Biokeralty Research Institute AIE, Parque Tecnológico de Álava, Vitoria- Gasteiz, Álava, Spain.

<sup>7</sup>National Institute of Occupational Health, Oslo, Norway.

<sup>8</sup>Health department, Flemish Institute for Technological Research (VITO), Mol, Belgium.

<sup>9</sup>Drug Delivery & Targeting, Vall d'Hebron Institute de Recerca (VHIR), Universitat Autònoma de Barcelona (UAB), 08035, Barcelona, Spain.

<sup>10</sup>Networking Research Centre for Bioengineering, Biomaterials, and nanomedicine (CIBER-BBN), Instituto de Salud Carlos III, 28029, Madrid, Spain.

<sup>11</sup>Functional Validation & Preclinical Research (FVPR) / U20 ICTS Nanobiosis, Vall d'Hebron Institut de Recerca (VHIR), Universitat Autònoma de Barcelona (UAB), 08035, Barcelona, Spain.

<sup>12</sup>Institut de Ciència de Materials de Barcelona, ICMA-B-CSIC, Campus UAB, 08193 Bellaterra, Spain.

<sup>13</sup>Advanced Materials and Bioengineering Research (AMBER) Centre, CRANN Institute, Trinity College Dublin, Dublin, Ireland.

\*Corresponding authors

**Keywords:** Endotoxin; nanomaterials; interlaboratory comparison; nanosafety; regulatory standards.

**Short title:** Comparing endotoxin contamination assessment of nanomaterials.

*Supplementary Table 1: Suppliers for endotoxin detection kits*

Endotoxin detection assays, their manufacturers and component lot numbers and plate readers used are described for each participant in the interlaboratory study. Abbreviation: ACC, Associates of Cape Cod.

| <b>Group ID</b> | <b>Assay</b>                                   | <b>Manufacturer</b> | <b>Lot numbers</b>                                                                  | <b>Plate reader</b>          |
|-----------------|------------------------------------------------|---------------------|-------------------------------------------------------------------------------------|------------------------------|
| 1               | Chromogenic (with beta-glucan inhibition)      | ACC                 | Lysate: 2041801<br>Endotoxin: H0K354<br>Glucan inhibition buffer: 1207054           | Epoch, Biotek                |
|                 | Chromogenic (without beta-glucan inhibition)   | ACC                 | Lysate: 2041801<br>Endotoxin: 166                                                   | Epoch, Biotek                |
|                 | Gel clot (without beta-glucan inhibition)      | ACC                 | Lysate: 518-11-902<br>Endotoxin: 166                                                | N/A                          |
| 2               | Gel clot (without beta-glucan inhibition)      | ACC                 | Lysate: 518-08-894<br>Endotoxin: 168                                                | N/A                          |
|                 | Turbidimetric (without beta-glucan inhibition) | ACC                 | Lysate: 521-03-011-T<br>Endotoxin: 168                                              | Pyros Kinetix Flex, ACC      |
|                 | Chromogenic (with beta-glucan inhibition)      | ACC                 | Lysate: 2042103<br>Endotoxin: H0K354<br>Glucan inhibition buffer: 1207081           | Pyros Kinetix Flex, ACC      |
|                 | Chromogenic (without beta-glucan inhibition)   | ACC                 | Lysate: 2042103<br>Endotoxin: H0K354                                                | Pyros Kinetix Flex, ACC      |
| 3               | Chromogenic (with beta-glucan inhibition)      | ACC                 | Lysate: CK0035<br>Endotoxin: 171<br>Glucan inhibition buffer: 1207056               | Pyros Kinetix Flex, ACC      |
|                 | Turbidimetric (without beta-glucan inhibition) | ACC                 | Lysate: 520-06-024-T<br>Endotoxin: 171                                              | Pyros Kinetix Flex, ACC      |
|                 | Turbidimetric (with beta-glucan inhibition)    | ACC                 | Lysate: 520-06-024-T<br>Endotoxin: 171<br>Glucan inhibition buffer: 1207056         | Pyros Kinetix Flex, ACC      |
| 4               | Chromogenic (with glucan inhibition)           | Pierce              | Lysate: 0E10Z00002<br>Endotoxin: 0H70M55705<br>Glucan inhibition buffer: 0000988163 | ELx800, BIOTEK               |
|                 | Chromogenic (without glucan inhibition)        | Pierce              | Lysate: 0E10Z00002<br>Endotoxin: 0H70M55705                                         | ELx800, BIOTEK               |
| 5               | Chromogenic (without glucan inhibition)        | Thermo Scientific   | Lysate: 0000865749<br>Endotoxin: 0000860495                                         | CLARIOstar Plus, BMG Labtech |
|                 | Recombinant factor C                           | BioMerieux          | Factor C: 21555<br>Endotoxin: 21496                                                 | CLARIOstar Plus, BMG Labtech |
|                 | Chromogenic (with glucan inhibiton)            | Lonza               | Lysate: WL088NxM3R<br>Endotoxin: 0000936780<br>Glucan inhibition buffer: 1207074    | CLARIOstar Plus, BMG Labtech |
| 6               | Chromogenic (without                           | Lonza               | Lysate: WL028L8LLM                                                                  | SynergyH1,                   |

|   |                                           |       |                                                                                     |                         |
|---|-------------------------------------------|-------|-------------------------------------------------------------------------------------|-------------------------|
|   | glucan inhibition)                        |       | Endotoxin: 0000936780                                                               | BIOTEK                  |
|   | Chromogenic (with glucan inhibition)      | Lonza | Lysate: WL028L8LLM<br>Endotoxin: 0000936780<br>Glucan inhibition buffer: 0000927979 | SynergyH1, BIOTEK       |
| 7 | Chromogenic (without glucan inhibition)   | Lonza | Lysate: WL028L8LLM<br>Endotoxin: 0000936780                                         | ELx800, BIOTEK          |
|   | Chromogenic (with glucan inhibition)      | Lonza | Lysate: WL045J0AAB<br>Endotoxin: 0000904567<br>Glucan inhibition buffer: 0000988163 | ELx800, BIOTEK          |
| 8 | Recombinant factor C                      | Lonza | Lysate: 0000961459<br>Endotoxin: 0000920758                                         | Infinite 200 Pro, TECAN |
|   | Gel clot (without beta-glucan inhibition) | Lonza | Lysate: 0000722832<br>Endotoxin: 0000723534<br>Glucan inhibition buffer: 0000988163 | N/A                     |

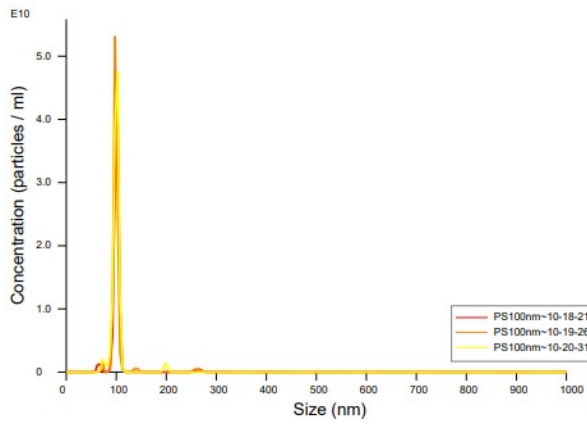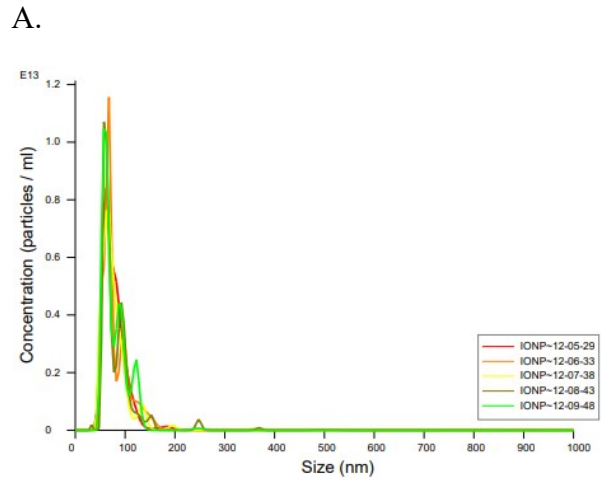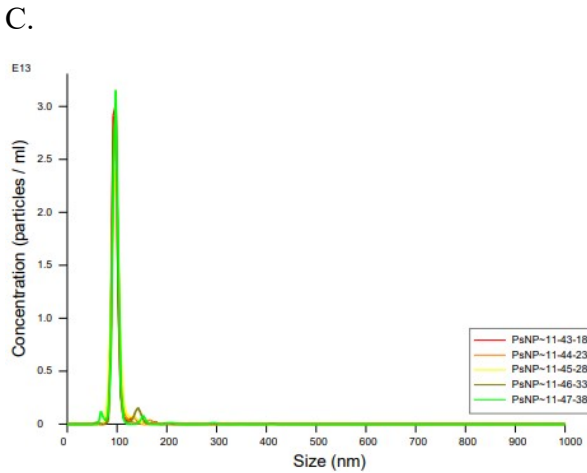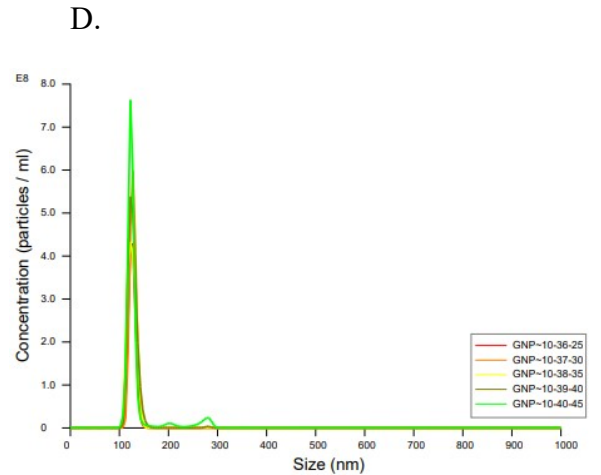

*Supplementary Figure 1: Data graphs for hydrodynamic size distribution by nanoparticle tracking analysis by the ILC coordinator prior to shipment*

Nanoparticle tracking analysis detailing size distribution for 100 nm calibration standard polystyrene nanoparticles (A), IONP (B), PsNP (C) and GNP (D). X-axis denotes hydrodynamic diameter for each nanomaterial while the Y-axis describes the corresponding nanoparticle concentration (measured in particle/ml).

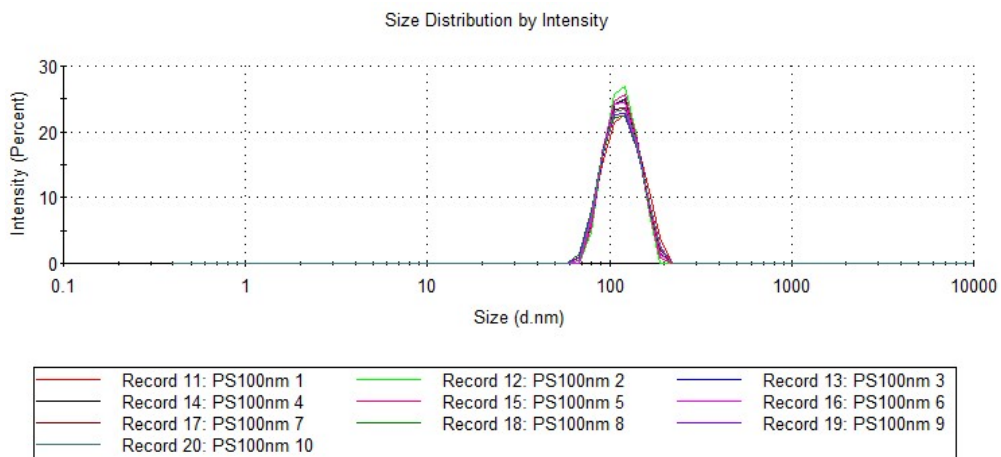

A.

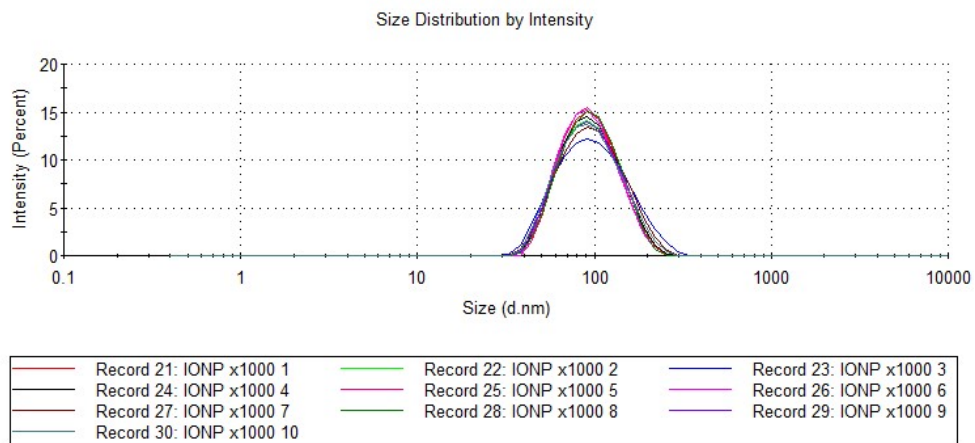

B.

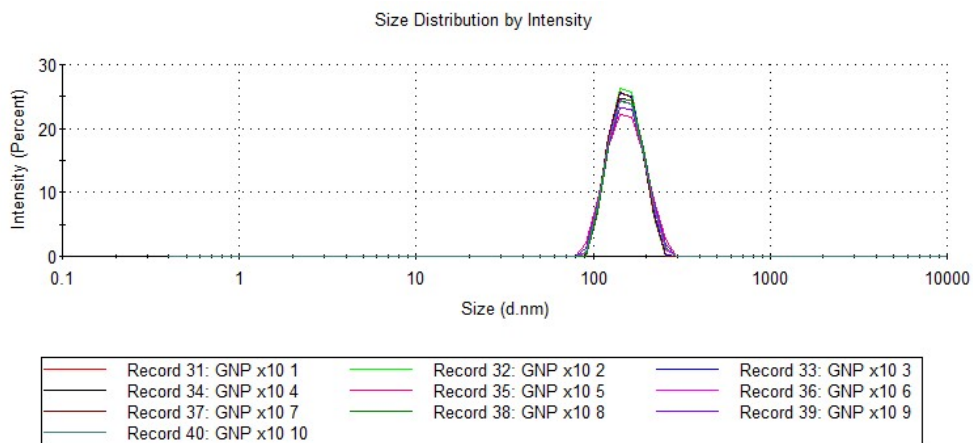

C.

D.

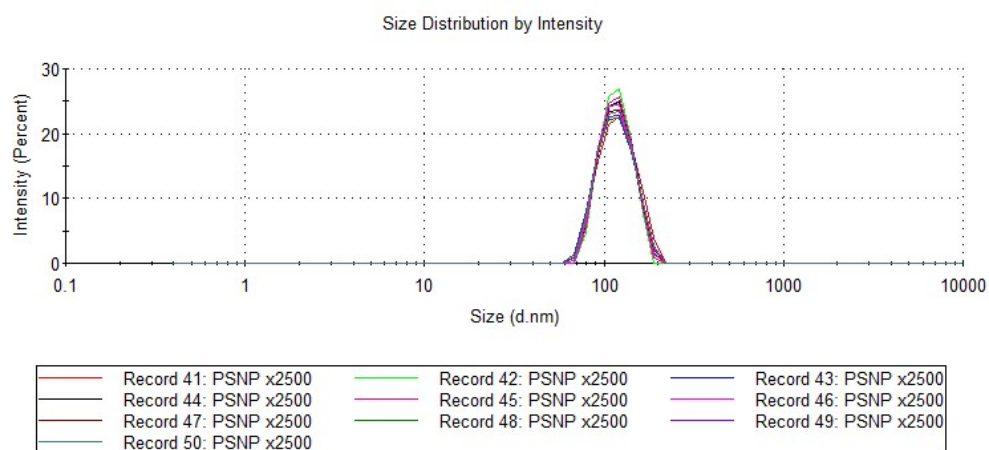

*Supplementary Figure 2: Data graphs for hydrodynamic size distribution by dynamic light scattering by the ILC coordinator prior to shipment*

Dynamic light scattering detailing size distribution for 100 nm calibration standard polystyrene nanoparticles (A), IONP (B), PsNP (C) and GNP (D). X-axis denotes hydrodynamic diameter for each nanomaterial while the Y-axis describes the light scattering intensity (measured in percent compared to maximum).

A.

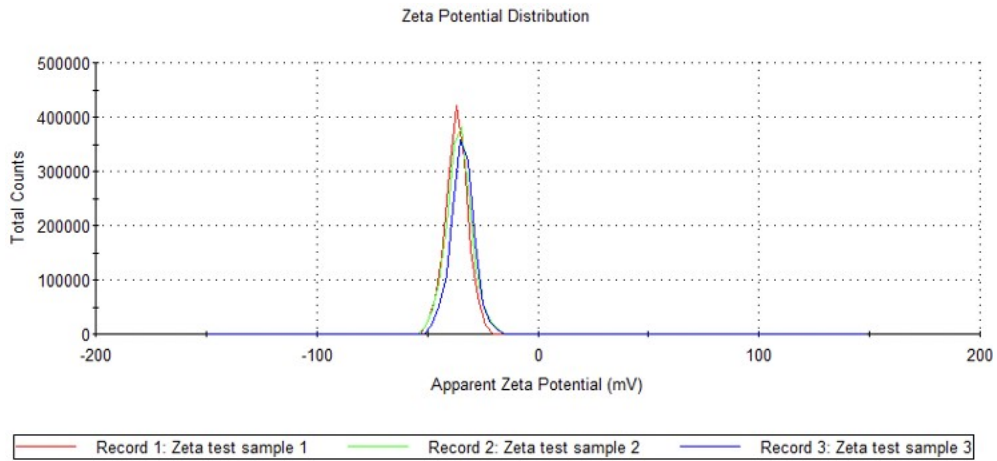

B.

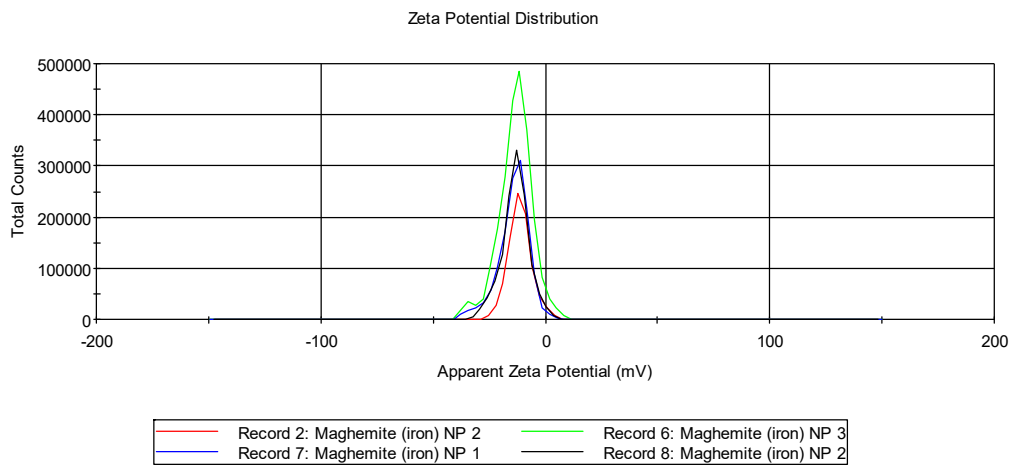

C.

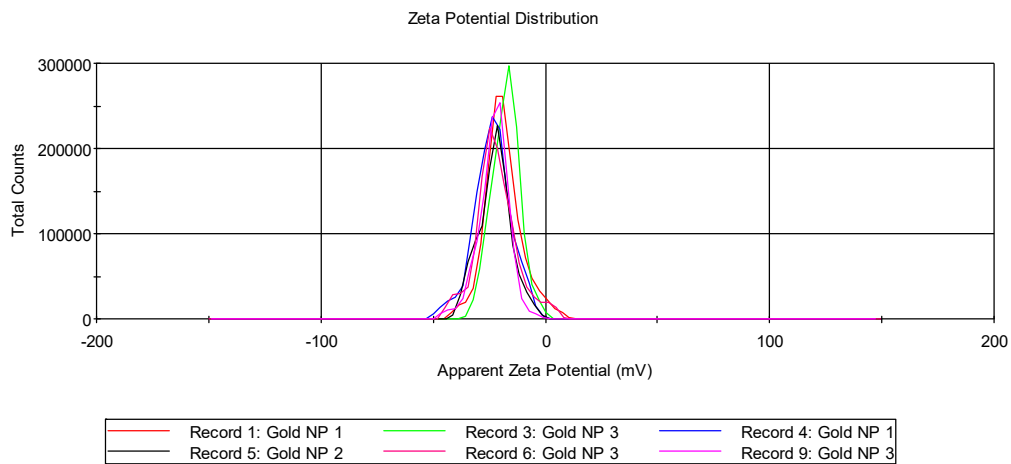

D.

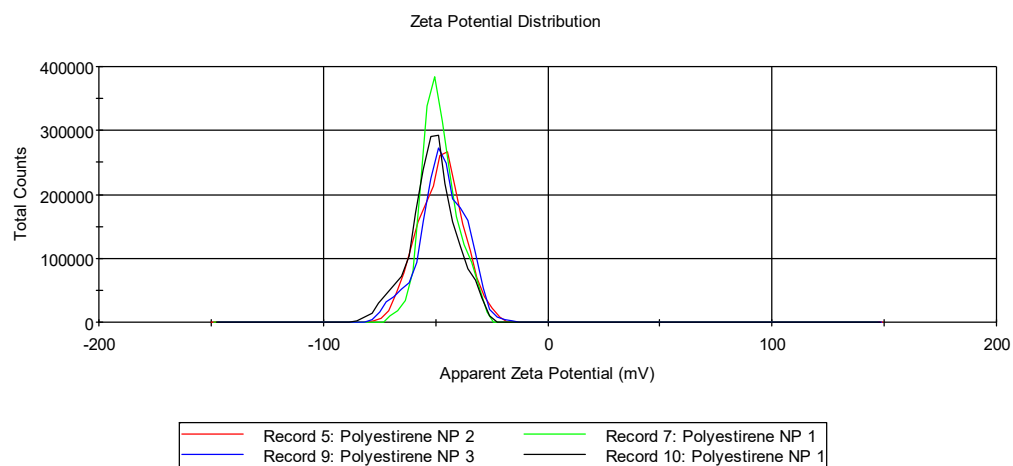

*Supplementary Figure 3: Data graphs for zeta potential measurements by dynamic light scattering*

Zeta potential measurements for ZTS1240 Malvern calibration standard (A), IONP (B) at pH 7.5, GNP (C) at pH 7, PsNP (D) at pH 7. and a -35 mV calibration standard (D; Malvern-Panalytical, United Kingdom). X-axis denotes apparent zeta potential while the Y-axis describes the corresponding count of events accounted.



*Supplementary Table 2: Summary of results for endotoxin testing*

Assays used and corresponding R-squared values or gel clot results are listed from each participant along with inhibition-enhancement (spike-recovery) control percentages or gel clot values. Additionally, the required dilutions used for each sample are recorded along with the associated endotoxin contamination level. Abbreviation: MVD, maximum valid dilution; N/A: not applicable.

| Group ID | Assay                                          | R <sup>2</sup> value/<br>Sensitivity test | IEC %/<br>result                                                                                   | Dilution required                                                    | EU/ml                                                   |
|----------|------------------------------------------------|-------------------------------------------|----------------------------------------------------------------------------------------------------|----------------------------------------------------------------------|---------------------------------------------------------|
| 1        | Chromogenic (with beta-glucan inhibition)      | R <sup>2</sup> = 0.99                     | IONP: 103%<br>GNP: 116%<br>PsNP: 115%<br>IF: 85%                                                   | IONP: x5000<br>GNP: x20<br>PsNP: x10000<br>IF: x2                    | IONP: 74.97<br>GNP: 0.31<br>PsNP: 28.16<br>IF: 0.002    |
|          | Chromogenic (without beta-glucan inhibition)   | R <sup>2</sup> = 0.99                     | IONP: 114%<br>GNP: 141%<br>PsNP: 99%<br>IF: 69%                                                    | IONP: x5000<br>GNP: x25<br>PsNP: x1000<br>IF: x1                     | IONP: 22.18<br>GNP: 0.38<br>PsNP: 86.98<br>IF: 0.01     |
|          | Gel clot (with beta-glucan inhibition)         | Pass                                      | IONP: No value obtained<br>GNP: No value obtained<br>PsNP: No value obtained<br>IF: Value obtained | IONP: MVD reached<br>GNP: MVD reached<br>PsNP: MVD reached<br>IF: x1 | IONP: N/A<br>GNP: N/A<br>PsNP: N/A<br>IF: <0.03         |
| 2        | Turbidimetric (without beta-glucan inhibition) | R <sup>2</sup> = 0.99                     | IONP: 95%<br>GNP: 118%<br>PsNP: 114%<br>IF: 117%                                                   | IONP: x12500<br>GNP: x500<br>PsNP: x2500<br>IF: x20                  | IONP: 122.0<br>GNP: 1.11<br>PsNP: 6.07<br>IF: <0.02     |
|          | Chromogenic (with beta-glucan inhibition)      | R <sup>2</sup> = 0.99                     | IONP: 66%<br>GNP: 113%<br>PsNP: 198%<br>IF: 119%                                                   | IONP: x500<br>GNP: x20<br>PsNP: x2500<br>IF: x20                     | IONP: 437.0<br>GNP: 0.96<br>PsNP: <12.5<br>IF: <0.02    |
|          | Chromogenic (without beta-glucan inhibition)   | R <sup>2</sup> = 0.99                     | IONP: 150%<br>GNP: 131%<br>PsNP: 148%<br>IF: 121%                                                  | IONP: x2500<br>GNP: x20<br>PsNP: x12500<br>IF: x20                   | IONP: 600.0<br>GNP: 0.985<br>PsNP: 101.0<br>IF: <0.1    |
|          | Gel clot (with beta-glucan inhibition)         | Pass                                      | IONP: No value obtained<br>GNP: No value obtained<br>PsNP: No value obtained<br>IF: Value obtained | IONP: MVD reached<br>GNP: MVD reached<br>PsNP: MVD reached<br>IF: x1 | IONP: N/A<br>GNP: N/A<br>PsNP: N/A<br>IF: <0.03         |
| 3        | Turbidimetric (without beta-glucan inhibition) | R <sup>2</sup> = 0.99                     | IONP: 122%<br>GNP: 90%<br>PsNP: 131%<br>IF: 137%                                                   | IONP: x10000<br>GNP: x1<br>PsNP: x5000<br>IF: x1                     | IONP: 958.0<br>GNP: 0.737<br>PsNP: 253.5<br>IF: <0.001  |
|          | Chromogenic (with beta-glucan inhibition)      | R <sup>2</sup> = 0.99                     | IONP: 130%<br>GNP: 156%<br>PsNP: 105%<br>IF: 129%                                                  | IONP: x1000<br>GNP: x5<br>PsNP: x5000<br>IF: x1                      | IONP: 0.214<br>GNP: 0.205<br>PsNP: <25.0<br>IF: <0.005  |
|          | Turbidimetric (with beta-glucan inhibition)    | R <sup>2</sup> = 0.99                     | IONP: 130%<br>GNP: 64%<br>PsNP: 130%<br>IF: 183%                                                   | IONP: x1000<br>GNP: x1<br>PsNP: x2500<br>IF: x1                      | IONP: 0.005<br>GNP: 0.199<br>PsNP: 0.0598<br>IF: <0.001 |
| 4        | Chromogenic                                    | R <sup>2</sup> = 0.98                     | IONP: 75%                                                                                          | IONP: x500                                                           | IONP: 292.0                                             |

|   |                                              |              |                                                                                                    |                                                                      |                                                      |
|---|----------------------------------------------|--------------|----------------------------------------------------------------------------------------------------|----------------------------------------------------------------------|------------------------------------------------------|
|   | (without beta-glucan inhibition)             |              | GNP: 86%<br>PsNP: 53%<br>IF: 90%                                                                   | GNP: x2<br>PsNP: x1000<br>IF: x1                                     | GNP: 1.1<br>PsNP: 706.1<br>IF: 0.01                  |
|   | Chromogenic (with beta-glucan inhibition)    | $R^2 = 0.99$ | IONP: 123%<br>GNP: 109%<br>PsNP: 83%<br>IF: 148%                                                   | IONP: x500<br>GNP: x2<br>PsNP: x1000<br>IF: x1                       | IONP: 132.4<br>GNP: 1.2<br>PsNP: 12.5<br>IF: <0.01   |
| 5 | Chromogenic (without beta-glucan inhibition) | $R^2 = 0.99$ | IONP: 100%<br>GNP: 95%<br>PsNP: 91%<br>IF: 108%                                                    | IONP: x50<br>GNP: x1<br>PsNP: x250<br>IF: x1                         | IONP: 44.3<br>GNP: 0.617<br>PsNP: 52.25<br>IF: 0.1   |
|   | Recombinant factor C                         | $R^2 = 0.99$ | IONP: 8%<br>GNP: 160%<br>PsNP: 104%<br>IF: 108%                                                    | IONP: MVD reached<br>GNP: x1<br>PsNP: x5<br>IF: x1                   | IONP: N/A<br>GNP: 0.148<br>PsNP: 0.715<br>IF: 0.01   |
| 6 | Chromogenic (with beta-glucan inhibition)    | $R^2 = 0.99$ | IONP: 147%<br>GNP: 131%<br>PsNP: 70%<br>IF: 94%                                                    | IONP: x1000<br>GNP: x5<br>PsNP: x1250<br>IF: x1                      | IONP: 64.19<br>GNP: 1.1<br>PsNP: <6.25<br>IF: <0.005 |
|   | Chromogenic (without beta-glucan inhibition) | $R^2 = 0.99$ | IONP: 179%<br>GNP: 179%<br>PsNP: 77%<br>IF: 99%                                                    | IONP: x1000<br>GNP: x5<br>PsNP: x1250<br>IF: x1                      | IONP: 348.5<br>GNP: 1.17<br>PsNP: 71.4<br>IF: <0.005 |
| 7 | Chromogenic (with beta-glucan inhibition)    | $R^2 = 0.99$ | IONP: 147%<br>GNP: 131%<br>PsNP: 70%<br>IF: 133%                                                   | IONP: x1000<br>GNP: x5<br>PsNP: x1250<br>IF: 1x                      | IONP: 146<br>GNP: 0.8<br>PsNP: <6.25<br>IF: <0.005   |
|   | Chromogenic (without beta-glucan inhibition) | $R^2 = 0.99$ | IONP: 179%<br>GNP: 179%<br>PsNP: 77%<br>IF: 99%                                                    | IONP: x1000<br>GNP: x5<br>PsNP: x1250<br>IF: x1                      | IONP: 256<br>GNP: 1.12<br>PsNP: 13.1<br>IF: <0.005   |
| 8 | Recombinant factor C                         | $R^2 = 0.99$ | IONP: 6%<br>GNP: 121%<br>PsNP: 37%<br>IF: 133%                                                     | IONP: MVD reached<br>GNP: x5<br>PsNP: MVD reached<br>IF: x1          | IONP: N/A<br>GNP: 0.18<br>PsNP: N/A<br>IF: <0.005    |
|   | Gel clot (with beta-glucan inhibition)       | Pass         | IONP: No value obtained<br>GNP: No value obtained<br>PsNP: No value obtained<br>IF: Value obtained | IONP: MVD reached<br>GNP: MVD reached<br>PsNP: MVD reached<br>IF: x1 | IONP: N/A<br>GNP: N/A<br>PsNP: N/A<br>IF: <0.06      |
